# Supplementary material for: The temporal association of excessive health expenditure with suicidal ideation among primary income earners: a cross-sectional design using the Korean Welfare Panel Survey (KoWePS)
Source: HighWire-hosted journal article supplement (doi:10.1136/bmjopen-2014-007421), 2015-06-01
Supplement: bmjopen-2014-007421supp_tables.pdf [file bmjopen-2014-007421supp_tables.pdf]

**Supplementary table 1.** Multivariate analysis, based on the presence of suicidal ideation during the past year among heads of households with the threshold of excessive health expenditure as forty percent from total expenditure in household.

|                                                      | Model 1 (-2logL= 1051.1) |          |      |                 | Model 2 (-2logL= 1035.3) |          |      |                 | Model 2<br>among depressive subjects |          |      |                 |
|------------------------------------------------------|--------------------------|----------|------|-----------------|--------------------------|----------|------|-----------------|--------------------------------------|----------|------|-----------------|
|                                                      | OR                       | 95% C.I. |      | <i>p</i> -value | OR                       | 95% C.I. |      | <i>p</i> -value | OR                                   | 95% C.I. |      | <i>p</i> -value |
| Excessive health expenditure during the last 2 years |                          |          |      |                 |                          |          |      |                 |                                      |          |      |                 |
| None                                                 | 1.00                     |          |      |                 | 1.00                     |          |      |                 | 1.00                                 |          |      |                 |
| 2011, remote                                         | 1.22                     | 0.60     | 2.51 | 0.583           | 1.11                     | 0.53     | 2.30 | 0.785           | 1.20                                 | 0.59     | 2.46 | 0.616           |
| 2012, recent                                         | 1.32                     | 0.68     | 2.55 | 0.415           | 1.20                     | 0.62     | 2.35 | 0.587           | 1.61                                 | 0.86     | 3.02 | 0.138           |
| 2011 and 2012                                        | 2.91                     | 1.24     | 6.86 | 0.014           | 2.67                     | 1.10     | 6.46 | 0.030           | 2.96                                 | 1.28     | 6.85 | 0.011           |

When we set the cut-off value as 40%, the EHE during the two consecutive years only have statistically meaningful increased odds ratios both in model 1 and 2. This might be due to the limited number of households, those spending more than 40% of disposable income as EHE.

Depressive subjects mean the primary income earners who reported depressive scales of sixteen or over, which is the cut-off value for potential major depressive disorder.

**Supplementary table 2.** Subgroup analysis by sex and various thresholds of EHEs.

| Excessive health expenditure<br>during the last two years | Excessive health expenditure<br>>10% |          |      | <i>p</i> -value | Excessive health expenditure<br>>20% |          |      | <i>p</i> -value | Excessive health expenditure<br>>40% |          |       | <i>p</i> -value |
|-----------------------------------------------------------|--------------------------------------|----------|------|-----------------|--------------------------------------|----------|------|-----------------|--------------------------------------|----------|-------|-----------------|
|                                                           | OR                                   | 95% C.I. |      |                 | OR                                   | 95% C.I. |      |                 | OR                                   | 95% C.I. |       |                 |
| Men                                                       |                                      |          |      |                 |                                      |          |      |                 |                                      |          |       |                 |
| None                                                      | 1.00                                 | 1.00     | 1.00 |                 | 1.00                                 | 1.00     | 1.00 |                 | 1.00                                 | 1.00     | 1.00  |                 |
| 2011, the remote one year                                 | 1.28                                 | 0.58     | 2.83 | 0.546           | 1.15                                 | 0.49     | 2.72 | 0.753           | 0.73                                 | 0.22     | 2.43  | 0.611           |
| 2012, the recent one year                                 | 1.37                                 | 0.66     | 2.87 | 0.398           | 1.74                                 | 0.86     | 3.51 | 0.124           | 0.96                                 | 0.37     | 2.53  | 0.934           |
| 2011 and 2012, the straight two<br>years                  | 1.55                                 | 0.75     | 3.20 | 0.240           | 1.12                                 | 0.48     | 2.65 | 0.793           | 1.56                                 | 0.42     | 5.79  | 0.508           |
| Women                                                     |                                      |          |      |                 |                                      |          |      |                 |                                      |          |       |                 |
| None                                                      | 1.00                                 | 1.00     | 1.00 |                 | 1.00                                 | 1.00     | 1.00 |                 | 1.00                                 | 1.00     | 1.00  |                 |
| 2011, the remote one year                                 | 1.31                                 | 0.53     | 3.28 | 0.558           | 1.01                                 | 0.42     | 2.41 | 0.983           | 1.26                                 | 0.48     | 3.32  | 0.644           |
| 2012, the recent one year                                 | 2.71                                 | 1.25     | 5.86 | 0.011           | 2.66                                 | 1.37     | 5.15 | 0.004           | 1.40                                 | 0.54     | 3.64  | 0.486           |
| 2011 and 2012, the straight two<br>years                  | 1.75                                 | 0.82     | 3.76 | 0.149           | 2.19                                 | 0.95     | 5.07 | 0.067           | 4.73                                 | 1.21     | 18.46 | 0.025           |

According to the results, women are more vulnerable to suicidal ideation by EHEs than men. Although, men do not have statistically meaningful odds ratio, the EHE with recent one year had higher values for suicidal ideation than the reference group without any EHE history during the last two years.
